# Supplementary figures and images for: Impact of Temperature on Survival Rate, Fecundity, and Feeding Behavior of Two Aphids, Aphis gossypii and Acyrthosiphon gossypii, When Reared on Cotton
Source: MDPI journal article supplement (doi:10.3390/insects12060565), 2021-06-21

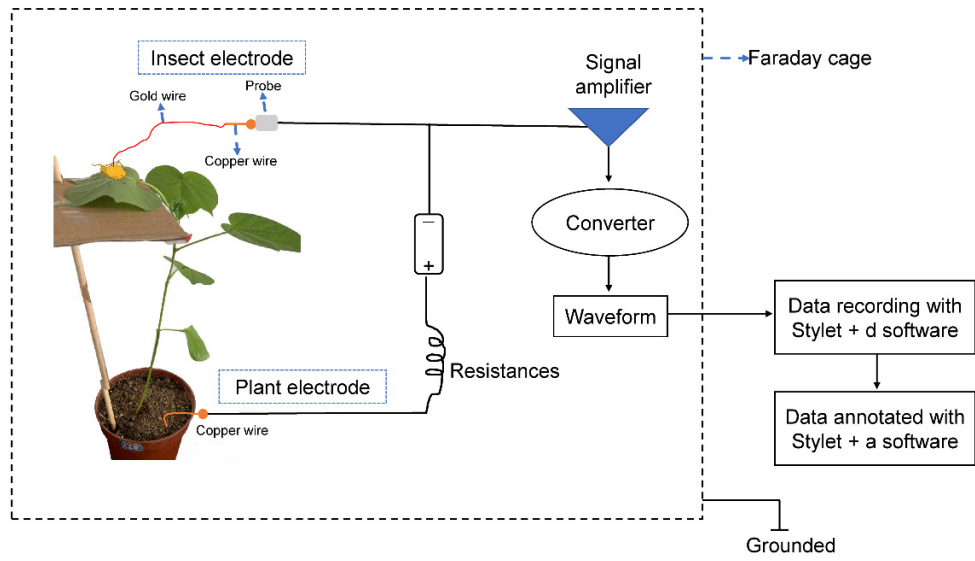

Figure S1 A direct current electrical penetration graph amplifier system with Faraday cage

Supplement: s1 [file s1]
